# Supplementary material
Source: publisher figshare collection journal article supplement (https://sage.figshare.com/ndownloader/files/11774939)
Supplement: Supplementary file 1 [file 11774939]

**Supplemental Tables**

**Investigating the Theoretical Structure of the Differential Ability Scales—Second Edition Through Hierarchical Exploratory**

**Factor Analysis**

**By REDACTED**

Table A1

*Differential Ability Scales, Second Edition (DAS-II) Exploratory Factor Analysis: Three Oblique Factor Solution for the Standardization Sample 5 to 8 Year Olds (N = 787)*

| DAS-II Subtest                             | <i>g</i> | F1:              | F2:              | F3:              | <i>h</i> <sup>2</sup> |
|--------------------------------------------|----------|------------------|------------------|------------------|-----------------------|
| Recall of Design (Gv)                      | .70      | <b>.82 (.76)</b> | -.01 (.53)       | .03 (.33)        | .579                  |
| Copy (Gv)                                  | .63      | <b>.80 (.70)</b> | -.15 (.47)       | .03 (.30)        | .501                  |
| Matching Letter Like Form (Gv)             | .63      | <b>.64 (.66)</b> | .02 (.51)        | .10 (.29)        | .439                  |
| Pattern Construction-Alternative (Gv)      | .73      | <b>.63 (.75)</b> | .21 (.64)        | -.11 (.26)       | .583                  |
| Early Number Concepts (Gc/Gf)              | .69      | <b>.57 (.70)</b> | .20 (.60)        | -.04 (.28)       | .499                  |
| Recognition of Pictures (Gv)               | .57      | <b>.53 (.58)</b> | .00 (.46)        | .12 (.35)        | .350                  |
| Sequential and Quantitative Reasoning (Gf) | .75      | <b>.51 (.73)</b> | .38 (.70)        | -.16 (.22)       | .604                  |
| Rapid Naming (Gs)                          | .49      | <b>.47 (.50)</b> | -.03 (.38)       | .12 (.31)        | .264                  |
| Speed of Information Processing (Gs)       | .43      | <b>.44 (.45)</b> | .05 (.33)        | .10 (.27)        | .210                  |
| Digit Backwards (Gsm)                      | .69      | <b>.44 (.67)</b> | .28 (.63)        | .04 (.35)        | .482                  |
| Picture Similarities (Gf)                  | .54      | <b>.33 (.52)</b> | .27 (.50)        | -.03 (.23)       | .300                  |
| Word Definitions (Gc)                      | .64      | -.23 (.47)       | <b>.90 (.75)</b> | .05 (.35)        | .584                  |
| Verbal Similarities (Gc)                   | .70      | -.02 (-.57)      | <b>.77 (.76)</b> | .02 (.35)        | .583                  |
| Naming Vocabulary (Gc)                     | .65      | -.02 (.53)       | <b>.72 (.71)</b> | .02 (.33)        | .508                  |
| Verbal Comprehension (Gc)                  | .65      | .14 (.57)        | <b>.58 (.68)</b> | -.01 (.30)       | .465                  |
| Recall of Sequential Order (Gwm)           | .73      | .25 (.65)        | <b>.47 (.71)</b> | .11 (.42)        | .539                  |
| Digit Forward (Gsm)                        | .62      | .21 (.55)        | <b>.43 (.61)</b> | .05 (.33)        | .392                  |
| Matrices (Gf)                              | .65      | <b>.32 (.61)</b> | <b>.38 (.62)</b> | -.04 (.27)       | .428                  |
| Recall of Object Delayed (Glr)             | .47      | .06 (.38)        | -.02 (.39)       | <b>.78 (.80)</b> | .643                  |
| Recall of Object Immediate (Glr)           | .55      | .05 (.44)        | .10 (.47)        | <b>.76 (.82)</b> | .685                  |
| Eigenvalue                                 |          | 8.47             | 1.31             | 1.23             |                       |
| % Variance                                 |          | 42.4             | 6.5              | 6.1              |                       |
| <b>Factor Correlations</b>                 |          |                  |                  |                  |                       |
| Verbal Comprehension                       |          | 1.000            |                  |                  |                       |
| Visual Spatial                             |          | .754             | 1.000            | .444             |                       |
| Working Memory                             |          | .422             | .444             | 1.000            |                       |

*Note.* *g* = general structure coefficients based on first unrotated factor coefficients (*g* loadings), *h*<sup>2</sup> = Communality. Factor pattern coefficients (structure coefficients) based on principal factors extraction with promax rotation (*k* = 4). Salient pattern coefficients presented in bold (pattern coefficient ≥ .30).

Table A2  
*Differential Ability Scales, Second Edition (DAS-II) Exploratory Factor Analysis: Five Oblique Factor Solution for the Standardization Sample 5 to 8 Year Olds (N = 787)*

| DAS-II Subtest                             | <i>g</i> | F1: Gv/Gf        | F2: Gc           | F3: Gf           | F4: Glr          | F5: Gwm          | <i>h</i> <sup>2</sup> |
|--------------------------------------------|----------|------------------|------------------|------------------|------------------|------------------|-----------------------|
| Recall of Designs (Gv)                     | .70      | <b>.89 (.80)</b> | .03 (.51)        | -.13 (.55)       | -.02 (.34)       | -.00 (.54)       | .649                  |
| Copying (Gv)                               | .63      | <b>.74 (.72)</b> | -.09 (.43)       | -.03 (.52)       | -.01 (.31)       | .08 (.52)        | .518                  |
| Pattern Construction-Alternative (Gv)      | .73      | <b>.47 (.72)</b> | .14 (.60)        | .31 (.70)        | -.08 (.29)       | -.04 (.57)       | .588                  |
| Speed of Information Processing (Gs)       | .43      | <b>.46 (.46)</b> | .03 (.32)        | -.08 (.33)       | .08 (.27)        | .02 (.34)        | .222                  |
| Rapid Naming (Gs)                          | .49      | <b>.45 (.51)</b> | .03 (.37)        | -.03 (.39)       | .10 (.32)        | .03 (.39)        | .271                  |
| Recognition of Pictures (Gv)               | .57      | <b>.42 (.58)</b> | -.01 (.42)       | .26 (.52)        | .16 (.37)        | -.15 (.40)       | .372                  |
| Matching Letter-Like Form (Gv)             | .63      | <b>.41 (.63)</b> | -.10 (.45)       | .23 (.58)        | .01 (.31)        | .16 (.55)        | .440                  |
| Early Number Concepts (Gc/Gf)              | .69      | <b>.33(.66)</b>  | .04 (.55)        | .30 (.65)        | -.03 (.31)       | .13 (.59)        | .500                  |
| Picture Similarities (Gf)                  | .54      | <b>.32 (.51)</b> | .28 (.50)        | .10 (.48)        | -.03 (.24)       | -.08 (.40)       | .313                  |
| Naming Vocabulary (Gc)                     | .66      | .12 (.52)        | <b>.78 (.75)</b> | -.14 (.51)       | -.02 (.35)       | .01 (.52)        | .575                  |
| Word Definitions (Gc)                      | .64      | -.19 (.43)       | <b>.75 (.75)</b> | .12 (.55)        | .06 (.38)        | .02 (.52)        | .581                  |
| Verbal Similarities (Gc)                   | .70      | .20 (.54)        | <b>.68 (.77)</b> | .06 (.59)        | .01 (.38)        | .05 (.57)        | .591                  |
| Verbal Comprehension (Gc)                  | .65      | .12 (.54)        | <b>.50 (.67)</b> | .11 (.57)        | -.02 (.32)       | .04 (.53)        | .469                  |
| Matrices (Gf)                              | .65      | -.09 (.53)       | .03 (.55)        | <b>.77 (.75)</b> | .05 (.32)        | .00 (.53)        | .560                  |
| Sequential and Quantitative Reasoning (Gf) | .75      | .14 (.67)        | .09 (.62)        | <b>.69 (.82)</b> | -.10 (.27)       | -.01 (.60)       | .682                  |
| Recall of Objects-Immediate (Glr)          | .55      | .04 (.43)        | .07 (.46)        | .04 (.39)        | <b>.81 (.85)</b> | -.06 (.43)       | .724                  |
| Recall of Objects-Delayed (Glr)            | .47      | .06 (.38)        | -.04 (.36)       | -.05 (.30)       | <b>.77 (.79)</b> | .07 (.40)        | .620                  |
| Digits Backward (Gwm)                      | .70      | .09 (.61)        | -.06 (.55)       | .20 (.64)        | .01 (.37)        | <b>.58 (.75)</b> | .585                  |
| Digits Forward (Gwm)                       | .62      | .10 (.53)        | .27 (.58)        | -.18 (.48)       | -.03 (.34)       | <b>.55 (.67)</b> | .491                  |
| Recall of Sequential Order (Gwm)           | .73      | -.03 (.59)       | .17 (.65)        | .20 (.66)        | .09 (.45)        | <b>.45 (.73)</b> | .593                  |
| Eigenvalue                                 |          | 8.47             | 1.31             | 1.23             | .892             | .775             |                       |
| % Variance                                 |          | 42.4             | 6.5              | 6.1              | 4.5              | 3.9              |                       |
| <u>Factor Correlations</u>                 |          |                  |                  |                  |                  |                  |                       |
| F1                                         |          | 1.000            |                  |                  |                  |                  |                       |
| F2                                         |          | .656             | 1.000            |                  |                  |                  |                       |
| F3                                         |          | .751             | .716             | 1.000            |                  |                  |                       |
| F4                                         |          | .442             | .464             | .385             | 1.000            |                  |                       |
| F5                                         |          | .704             | .692             | .716             | .474             | 1.000            |                       |

*Note.* *g* = general structure coefficients based on first unrotated factor coefficients (*g* loadings), *h*<sup>2</sup> = Communality. Factor pattern coefficients (structure coefficients) based on principal factors extraction with promax rotation (*k* = 4). Salient pattern coefficients presented in bold (pattern coefficient ≥ .30).

Table A3

*Sources of Variance in the DAS-II for the Standardization Sample5 to 8 Year Olds (N = 787) According to a SL Orthogonalization Model with Three First-Order Factors*

| DAS-II Subtest                             | General |                | F1: ?      |                | F2: ?      |                | F3: Glr    |                | h <sup>2</sup> | u <sup>2</sup> |
|--------------------------------------------|---------|----------------|------------|----------------|------------|----------------|------------|----------------|----------------|----------------|
|                                            | b       | S <sup>2</sup> | b          | S <sup>2</sup> | b          | S <sup>2</sup> | b          | S <sup>2</sup> |                |                |
| Recall of Designs (Gv)                     | .66     | .43            | <b>.38</b> | <b>.14</b>     | -.05       | .00            | .02        | .00            | .579           | .421           |
| Copying (Gv)                               | .60     | .36            | <b>.37</b> | <b>.14</b>     | -.08       | .01            | .02        | .00            | .501           | .499           |
| Matching Letter Like Form (Gv)             | .59     | .35            | <b>.30</b> | <b>.09</b>     | .01        | .00            | .01        | .00            | .439           | .561           |
| Pattern Construction-Alternative (Gv)      | .69     | .48            | <b>.29</b> | <b>.09</b>     | .11        | .01            | -.09       | .01            | .581           | .419           |
| Early Number Concepts (Gc/Gf)              | .65     | .42            | <b>.26</b> | <b>.07</b>     | .11        | .01            | -.04       | .00            | .500           | .500           |
| Recognition of Pictures (Gv)               | .53     | .28            | <b>.24</b> | <b>.06</b>     | .00        | .00            | .10        | .01            | .352           | .648           |
| Sequential and Quantitative Reasoning (Gf) | .70     | .49            | <b>.24</b> | <b>.06</b>     | .20        | .04            | -.14       | .02            | .603           | .397           |
| Rapid Naming (Gs)                          | .46     | .21            | <b>.22</b> | <b>.05</b>     | -.01       | .00            | .11        | .01            | .267           | .733           |
| Speed of Information Processing (Gs)       | .40     | .16            | <b>.20</b> | <b>.04</b>     | -.02       | .00            | .09        | .01            | .212           | .788           |
| Digits Backward (Gwm)                      | .65     | .42            | <b>.20</b> | <b>.04</b>     | .15        | .02            | .04        | .00            | .483           | .517           |
| Picture Similarities (Gf)                  | .51     | .26            | <b>.15</b> | <b>.02</b>     | .14        | .02            | -.03       | .00            | .300           | .700           |
| Word Definitions (Gc)                      | .58     | .34            | -.11       | .01            | <b>.48</b> | <b>.23</b>     | .04        | .00            | .582           | .418           |
| Verbal Similarities (Gc)                   | .65     | .42            | -.01       | .00            | <b>.41</b> | <b>.17</b>     | .02        | .00            | .582           | .418           |
| Naming Vocabulary (Gc)                     | .60     | .36            | -.01       | .00            | <b>.38</b> | <b>.14</b>     | .02        | .00            | .507           | .493           |
| Verbal Comprehension (Gc)                  | .61     | .37            | .06        | .00            | <b>.31</b> | <b>.09</b>     | -.01       | .00            | .466           | .534           |
| Recall of Sequential Order (Gwm)           | .68     | .46            | .12        | .01            | <b>.25</b> | <b>.06</b>     | .09        | .01            | .539           | .461           |
| Digits Forward (Gwm)                       | .57     | .31            | .01        | .01            | <b>.23</b> | <b>.05</b>     | .05        | .00            | .392           | .608           |
| Matrices (Gf)                              | .60     | .36            | .16        | .02            | <b>.20</b> | <b>.04</b>     | -.04       | .00            | .428           | .572           |
| Recall of Objects-Delayed (Glr)            | .43     | .19            | .03        | .00            | -.01       | .00            | <b>.68</b> | <b>.46</b>     | .646           | .354           |
| Recall of Objects-Immediate (Glr)          | .50     | .25            | .02        | .00            | .05        | .00            | <b>.65</b> | <b>.43</b>     | .683           | .317           |
| Explained Common Variance (ECV)            |         | .719           |            | .088           |            | .093           |            | .100           | .482           | .482           |
| Explained Total Variance (ETV)             |         | .346           |            | .042           |            | .045           |            | .048           |                |                |
| $\omega_H / \omega_{HS}$                   |         | .842           |            | .145           |            | .186           |            | .534           |                |                |

*Note.*  $b$  = factor loading,  $S^2$  = variance explained,  $h^2$  = communality,  $u^2$  = uniqueness,  $\omega_H$  = Omega hierarchical (g),  $\omega_{HS}$  = Omega hierarchical subscale (group factors).

Table A4

*Sources of Variance in the DAS-II for the Standardization Sample 5 to 8 Year Olds (N=787) According to a SL Orthogonalization Model with Five First-Order Factors*

| DAS-II Subtest                             | General |       | Gv/Gs      |            | Gc         |            | Gf         |            | Glr        |            | Gwm        |            | $h^2$ | $u^2$ |
|--------------------------------------------|---------|-------|------------|------------|------------|------------|------------|------------|------------|------------|------------|------------|-------|-------|
|                                            | $b$     | $S^2$ | $b$        | $S^2$      | $b$        | $S^2$      | $b$        | $S^2$      | $b$        | $S^2$      | $b$        | $S^2$      |       |       |
| Recall of Designs (Gv)                     | .66     | .43   | <b>.46</b> | <b>.21</b> | .02        | .00        | -.07       | .01        | -.01       | .00        | -.00       | .00        | .654  | .346  |
| Copying (Gv)                               | .57     | .33   | <b>.39</b> | <b>.15</b> | -.05       | .00        | -.02       | .00        | -.01       | .00        | .07        | .01        | .481  | .519  |
| Pattern Construction-Alternative (Gv)      | .69     | .47   | <b>.24</b> | <b>.06</b> | .08        | .01        | .17        | .03        | -.05       | .00        | -.04       | .00        | .568  | .432  |
| Speed of Information Processing (Gs)       | .42     | .18   | <b>.24</b> | <b>.06</b> | .02        | .00        | -.04       | .00        | .05        | .00        | .01        | .00        | .238  | .762  |
| Rapid Naming (Gs)                          | .48     | .23   | <b>.24</b> | <b>.06</b> | .01        | .00        | -.02       | .00        | .06        | .00        | .02        | .00        | .291  | .709  |
| Recognition of Pictures (Gv)               | .62     | .39   | <b>.22</b> | <b>.05</b> | -.00       | .00        | .14        | .02        | .09        | .01        | -.13       | .02        | .481  | .519  |
| Matching Letter-Like Form (Gv)             | .55     | .30   | <b>.21</b> | <b>.05</b> | -.05       | .00        | .12        | .02        | .01        | .00        | .13        | .02        | .386  | .614  |
| Early Number Concepts (Gc/Gf)              | .61     | .37   | .17        | .03        | .02        | .00        | .16        | .03        | -.02       | .00        | .11        | .01        | .439  | .561  |
| Picture Similarities (Gf)                  | .53     | .28   | .17        | .03        | .15        | .02        | .06        | .00        | -.02       | .00        | -.07       | .00        | .339  | .661  |
| Naming Vocabulary (Gc)                     | .63     | .40   | .06        | .00        | <b>.41</b> | <b>.17</b> | -.08       | .01        | -.01       | .00        | .01        | .00        | .582  | .418  |
| Word Definitions (Gc)                      | .63     | .40   | -.10       | .01        | <b>.40</b> | <b>.16</b> | .07        | .00        | .03        | .00        | .02        | .00        | .575  | .425  |
| Verbal Similarities (Gc)                   | .67     | .45   | .01        | .00        | <b>.36</b> | <b>.13</b> | .03        | .00        | .01        | .00        | .04        | .00        | .578  | .422  |
| Verbal Comprehension (Gc)                  | .61     | .38   | .06        | .00        | <b>.26</b> | <b>.07</b> | .06        | .00        | -.01       | .00        | .03        | .00        | .455  | .545  |
| Matrices (Gf)                              | .64     | .40   | -.05       | .00        | .02        | .00        | <b>.42</b> | <b>.18</b> | .03        | .00        | .00        | .00        | .585  | .415  |
| Sequential and Quantitative Reasoning (Gf) | .69     | .47   | .07        | .01        | .05        | .00        | <b>.38</b> | <b>.14</b> | -.06       | .00        | -.01       | .000       | .626  | .374  |
| Recall of Objects-Immediate (Glr)          | .76     | .58   | .02        | .00        | .04        | .00        | .02        | .00        | <b>.46</b> | <b>.21</b> | -.05       | .00        | .793  | .207  |
| Recall of Objects-Delayed (Glr)            | .64     | .40   | .03        | .00        | -.02       | .00        | -.03       | .00        | <b>.44</b> | <b>.19</b> | .06        | .00        | .601  | .399  |
| Digits Backward (Gwm)                      | .51     | .26   | .05        | .00        | -.03       | .00        | .11        | .01        | .01        | .00        | <b>.49</b> | <b>.24</b> | .510  | .490  |
| Digits Forward (Gwm)                       | .44     | .19   | .05        | .00        | .15        | .02        | -.10       | .01        | -.02       | .00        | <b>.47</b> | <b>.22</b> | .446  | .554  |
| Recall of Sequential Order (Gwm)           | .60     | .36   | -.01       | .00        | .09        | .01        | .11        | .01        | .05        | .00        | <b>.39</b> | <b>.15</b> | .526  | .474  |
| Explained Common Variance (ECV)            | .715    |       | .070       |            | .059       |            | .046       |            | .042       |            | .067       |            | .508  | .492  |
| Explained Total Variance (ETV)             | .363    |       | .036       |            | .030       |            | .023       |            | .022       |            | .034       |            |       |       |
| $\omega_H/\omega_{HS}$                     | .872    |       | .146       |            | .198       |            | .200       |            | .240       |            | .314       |            |       |       |

*Note.*  $b$  = factor loading,  $S^2$  = variance explained,  $h^2$  = communality,  $u^2$  = uniqueness,  $\omega_H$  = Omega hierarchical (g),  $\omega_{HS}$  = Omega hierarchical subscale (group factors).
